# Supplementary material for: Vitamin D status and risk factors among pregnancy of shanghai in China
Source: Research Square preprint supplement (doi:10.21203/rs.3.rs-244871/v1), 2021-03-11
Supplement: Supplementary file 1 [file 38a1fed2d538af56f363bfb1.docx]

**Table 1 Characteristics of Chinese pregnant women in Shanghai (n= 953)**

| Variable/group | 25(OH)D (ng/ml) | | | |  | Percentage with 25(OH)D (ng/ml) | | | | P value |
| --- | --- | --- | --- | --- | --- | --- | --- | --- | --- | --- |
| n | Mean | 95%CI | P value | n | <12 | 12–19 | 20–29 | 30–50 |
| Total | 953 | 16.06 | 10.90-20.60 |  | 953 | 31.79%  (303) | 40.71%  (388) | 25.08%(239) | 2.42%  (23) |  |
| Age (years) | | | | | | | | | | |
| 20-25 | 120 | 15.64 | 14.55-16.72 | 8.48 | 120 | 31.67%  (38) | 42.5%  (51) | 25.83%(31) | 0%  (0) | 17.62 |
| 25-30 | 471 | 15.63 | 15.00-16.24 |  | 471 | 36.52%  (172) | 38.43%  (181) | 22.51%(106) | 2.54%  (12) |  |
| 30-35 | 274 | 16.77 | 15.97-17.56 |  | 274 | 26.28%  (72) | 41.61%  (114) | 29.56%(81) | 2.55%  (7) |  |
| ≥35 | 88 | 16.79 | 15.45-18.11 | 0.04 | 88 | 23.86%  (21) | 47.73%  (42) | 23.86%(21) | 4.55%  (4) | 0.04 |
| Parity | | | | | | | | | | |
| 0 | 671 | 16.38 | 15.86-16.91 | 2.70 | 671 | 30.70%  (206) | 41.28%  (277) | 26.08%(175) | 1.94%  (13) | 44.90 |
| 1 | 248 | 15.29 | 14.54-16.03 |  | 248 | 35.08%  (87) | 40.73%  (101) | 23.39%  (58) | 0.80%  (2) |  |
| ≥2 | 34 | 14.25 | 12.25-15.26 | 0.04 | 34 | 29.41%  (10) | 29.41%  (10) | 17.65%  (6) | 23.53%  (80) | 0.00 |
| Pre-pregnancy BMI (kg/m2) | | | | | | | | | | |
| underweight | 119 | 17.13 | 16.01-18.25 | 14.00 | 119 | 15.97%  (19) | 52.10%  (62) | 28.58%  (34) | 21.05%  (4) | 29.28 |
| normal | 623 | 16.36 | 15.81-16.90 |  | 623 | 32.10%  (200) | 38.20%  (238) | 27.13%  (169) | 2.57%  (16) |  |
| overweight | 162 | 14.66 | 13.74-15.57 |  | 162 | 40.74%  (66) | 40.74%  (66) | 17.90%  (29) | 0.62%  (1) |  |
| obese | 49 | 14.29 | 12.76-15.82 | 0.00 | 49 | 36.73%  (18) | 44.90%  (22) | 14.29%  (7) | 4.08%  (2) | 0.01 |
| Gestational diabetes mellitus | | | | | | | | | | |
| Yes | 56 | 16.13 | 15.21-17.52 | 12.5 | 56 | 39.29%  (22) | 32.14%  (18) | 25.00%  (14) | 3.57%  (2) | 2.35 |
| No | 897 | 14.96 | 13.98-16.07 | 0.02 | 897 | 31.33%  (281) | 41.25%  (370) | 25.08%  (225) | 2.34%  (21) | 0.01 |
| Gestational Hyperlipemia | | | | | | | | | | |
| No | 931 | 16.08 | 15.01-17.02 | 0.44 | 931 | 31.90%  (297) | 40.71%  (379) | 25.13%  (234) | 2.26%  (21) | 0.56 |
| Yes | 22 | 15.42 | 12.95-16.27 | 0.66 | 22 | 27.27%  (6) | 40.91%  (9) | 22.73%  (5) | 9.09%  (2) | 0.91 |
