# Supplementary material for: Vitamin D status and risk factors among pregnancy of shanghai in China
Source: Research Square preprint supplement (doi:10.21203/rs.3.rs-244871/v1), 2021-03-11
Supplement: Supplementary file 3 [file 5ff959e45d74c2e3c923cc1f.docx]

**Table 2. Multinomial logistic regression model for vitamin D deficiency among pregnant of shanghai in China (n =953)**

| Variable/group | n | OR | 95% CI | P value |
| --- | --- | --- | --- | --- |
| Age (years) | | | | |
| ＜30 | 591 | ref |  |  |
| ≥ 30 | 362 | 3.54 | 1.76-4.35 | 0.02 |
| Parity | | | | |
| ＜2 | 921 | ref |  |  |
| ≥2 | 32 | 2.79 | 1.64-4.92 | 0.03 |
| Pre-pregnancy BMI (kg/m2) | | | | |
| underweight | 119 | 1.14 | 0.84-2.11 | 0.41 |
| normal | 623 | ref |  |  |
| overweight | 162 | 2.12 | 1.65-4.79 | 0.03 |
| obese | 49 | 2.16 | 1.84-5.05 | 0.02 |
| Gestational diabetes mellitus | | | | |
| No | 56 | ref |  |  |
| Yes | 897 | 2. 58 | 2. 43-3. 74 | 0.02 |
| Gestational Hyperlipemia | | | | |
| No | 931 | ref |  |  |
| Yes | 22 | 1. 49 | 1. 26-2.43 | 0.04 |
